# Supplementary material for: Could the Presence of Thrips AFFECT the Yield Potential of Genetically Modified and Conventional Maize?
Source: MDPI journal article supplement (doi:10.3390/toxins14070502), 2022-07-19
Supplement: s1 [file s1]

*Article*

# **Could the Presence of Thrips AFFECT the Yield Potential of Genetically Modified and Conventional Maize?**

**Ludovít Cagán, Peter Bokor and Oxana Skoková Habuštová**

**Table S1.** Number of thrips in transparent sticky traps installed in maize field experiment during experimental seasons **2013-2015**. Locality: Borovce, Slovakia. Sum from 10 repetitions. Each repetition is the sum of thrips from one transparent sticky trap that were collected after seven days of their installation. Non-Bt- isolate (DKC 3871), Bt - maize (DKC 3872 YG).

| Date of collection | <i>Limothrips denticornis</i> |    | <i>Limothrips cerealium</i> |    | <i>Haplothrips aculeatus</i> |     | <i>Frankliniella schultzei</i> |    | <i>Frankliniella occidentalis</i> |    | <i>Thrips tabaci</i> |    | <i>Aeolothrips fasciatus</i> |    | <i>Frankliniella tenuicornis</i> |    | <i>Chirothrips spp.</i> |    |
|--------------------|-------------------------------|----|-----------------------------|----|------------------------------|-----|--------------------------------|----|-----------------------------------|----|----------------------|----|------------------------------|----|----------------------------------|----|-------------------------|----|
|                    | Non-Bt                        | Bt | Non-Bt                      | Bt | Non-Bt                       | Bt  | Non-Bt                         | Bt | Non-Bt                            | Bt | Non-Bt               | Bt | Non-Bt                       | Bt | Non-Bt                           | Bt | Non-Bt                  | Bt |
| <b>2013</b>        |                               |    |                             |    |                              |     |                                |    |                                   |    |                      |    |                              |    |                                  |    |                         |    |
| June 17            | 1                             | 0  | 10                          | 14 | 1                            | 1   | 7                              | 2  | 1                                 | 1  | 0                    | 1  | 0                            | 0  | 14                               | 19 | 1                       | 0  |
| July 1             | 0                             | 2  | 4                           | 3  | 0                            | 0   | 6                              | 1  | 1                                 | 2  | 0                    | 0  | 21                           | 34 | 8                                | 6  | 0                       | 0  |
| July 15            | 29                            | 21 | 50                          | 56 | 293                          | 324 | 41                             | 33 | 4                                 | 11 | 1                    | 1  | 83                           | 55 | 47                               | 44 | 2                       | 3  |
| July 29            | 2                             | 3  | 6                           | 6  | 102                          | 99  | 5                              | 2  | 23                                | 18 | 0                    | 0  | 48                           | 42 | 13                               | 6  | 26                      | 21 |
| August 12          | 0                             | 0  | 0                           | 1  | 0                            | 13  | 4                              | 0  | 3                                 | 2  | 0                    | 0  | 9                            | 29 | 6                                | 9  | 3                       | 3  |
| August 26          | 0                             | 0  | 0                           | 0  | 2                            | 4   | 0                              | 0  | 0                                 | 0  | 0                    | 0  | 0                            | 0  | 0                                | 0  | 4                       | 4  |
| September 09       | 0                             | 0  | 0                           | 0  | 0                            | 0   | 0                              | 0  | 0                                 | 0  | 0                    | 0  | 0                            | 0  | 0                                | 0  | 0                       | 0  |
| September 23       | 0                             | 0  | 0                           | 0  | 1                            | 0   | 0                              | 0  | 0                                 | 0  | 0                    | 0  | 0                            | 0  | 0                                | 0  | 0                       | 0  |
| October 07         | 0                             | 0  | 0                           | 0  | 0                            | 0   | 0                              | 0  | 0                                 | 0  | 0                    | 0  | 0                            | 0  | 0                                | 0  | 0                       | 0  |
| <b>2014</b>        |                               |    |                             |    |                              |     |                                |    |                                   |    |                      |    |                              |    |                                  |    |                         |    |
| June 10            | 0                             | 0  | 21                          | 47 | 0                            | 0   | 11                             | 31 | 0                                 | 0  | 1                    | 1  | 0                            | 0  | 5                                | 6  | 0                       | 0  |
| June 24            | 1                             | 0  | 20                          | 17 | 2                            | 1   | 8                              | 4  | 3                                 | 0  | 1                    | 1  | 6                            | 2  | 9                                | 4  | 0                       | 1  |

|              |   |   |     |     |    |    |    |     |    |    |   |    |    |    |    |    |   |   |
|--------------|---|---|-----|-----|----|----|----|-----|----|----|---|----|----|----|----|----|---|---|
| July 08      | 1 | 0 | 40  | 37  | 38 | 20 | 10 | 6   | 6  | 0  | 1 | 1  | 7  | 2  | 9  | 2  | 1 | 0 |
| July 22      | 2 | 0 | 4   | 3   | 9  | 10 | 0  | 4   | 0  | 1  | 0 | 0  | 0  | 1  | 0  | 1  | 2 | 0 |
| August 05    | 0 | 0 | 0   | 0   | 0  | 2  | 2  | 0   | 0  | 0  | 0 | 0  | 0  | 0  | 0  | 0  | 2 | 0 |
| August 19    | 0 | 0 | 0   | 0   | 0  | 0  | 1  | 2   | 0  | 0  | 0 | 0  | 0  | 0  | 0  | 0  | 0 | 0 |
| September 03 | 0 | 0 | 0   | 0   | 0  | 0  | 0  | 0   | 0  | 0  | 0 | 0  | 0  | 0  | 0  | 0  | 0 | 0 |
| September 16 | 0 | 0 | 0   | 0   | 0  | 0  | 0  | 0   | 0  | 0  | 0 | 0  | 0  | 0  | 0  | 0  | 0 | 0 |
| October 01   | 0 | 0 | 0   | 0   | 0  | 0  | 0  | 0   | 0  | 0  | 0 | 0  | 0  | 0  | 0  | 0  | 0 | 0 |
| <b>2015</b>  |   |   |     |     |    |    |    |     |    |    |   |    |    |    |    |    |   |   |
| June 18      | 1 | 1 | 16  | 16  | 0  | 1  | 6  | 8   | 2  | 2  | 1 | 1  | 2  | 3  | 6  | 8  | 0 | 0 |
| July 01      | 2 | 0 | 89  | 113 | 4  | 5  | 40 | 126 | 6  | 3  | 7 | 10 | 10 | 24 | 14 | 25 | 0 | 0 |
| July 16      | 3 | 0 | 123 | 75  | 11 | 3  | 3  | 0   | 25 | 10 | 2 | 0  | 0  | 0  | 33 | 20 | 0 | 0 |
| July 30      | 0 | 0 | 0   | 1   | 33 | 8  | 1  | 0   | 30 | 19 | 0 | 0  | 36 | 24 | 6  | 8  | 0 | 0 |
| August 12    | 0 | 0 | 0   | 0   | 1  | 2  | 0  | 0   | 50 | 21 | 0 | 0  | 1  | 1  | 7  | 4  | 0 | 0 |
| August 27    | 0 | 0 | 0   | 0   | 1  | 6  | 0  | 0   | 0  | 0  | 0 | 0  | 0  | 0  | 1  | 2  | 0 | 0 |
| September 01 | 0 | 0 | 0   | 0   | 0  | 0  | 0  | 0   | 0  | 0  | 0 | 0  | 0  | 0  | 0  | 0  | 0 | 0 |
| September 24 | 0 | 0 | 0   | 0   | 0  | 0  | 0  | 0   | 0  | 0  | 0 | 0  | 0  | 0  | 1  | 0  | 0 | 2 |

**Table S2.** Climatic data among climatic conditions during the collection of thrips in the experimental seasons **2013-2015**. T (+7) = average daily temperature during seven days of trap installation. T (-7+7) = average daily temperature during seven days before trap installation and during the time of trap installation. R (+7) = sum of precipitation during seven days of trap installation, R (-7+7) – the sum of precipitation during seven days before trap installation and during the time of trap installation. R (-30+7) sum of precipitation during 28 days before trap installation and during the time of trap installation. WS (+7) hourly means of wind speed ( $\text{ms}^{-1}$ ) and WG (+7) wind gusts ( $\text{ms}^{-1}$ ) during seven days of trap installation.

| Year | Date of trap collection | T (+7)  | T (-7+7) | R (+7) | R (-7+7) | R (-30+ 7) | WS (+7) | WG (+7) |
|------|-------------------------|---------|----------|--------|----------|------------|---------|---------|
| 2013 | June 17                 | 19.725  | 18.09333 | 30.3   | 36.1     | 94.7       | 5.5714  | 9.5714  |
| 2013 | July 01                 | 14.5125 | 19.49333 | 15.8   | 15.8     | 103.0      | 6.5714  | 11.7143 |
| 2013 | July 15                 | 19.75   | 20.35333 | 3.6    | 5.4      | 51.5       | 5.7143  | 9.4286  |
| 2013 | July 29                 | 25.0875 | 23.21333 | 0.1    | 0.1      | 21.3       | 3.4286  | 6.5714  |
| 2013 | August 12               | 24.6625 | 24.96667 | 10.9   | 18.4     | 22.1       | 5.0000  | 9.2857  |
| 2013 | August 26               | 18.55   | 18.96667 | 14.5   | 20.1     | 35.0       | 5.7143  | 9.8571  |
| 2013 | September 09            | 16.7125 | 16.80667 | 8.7    | 48.5     | 75.1       | 5.1429  | 8.8571  |
| 2013 | September 23            | 12.675  | 13.58667 | 29.2   | 56.0     | 111.7      | 6.5714  | 10.2857 |
| 2013 | October 07              | 8.75    | 10.4     | 0.0    | 0.1      | 56.3       | 5.8571  | 9.1429  |
| 2014 | June 10                 | 19.4125 | 16.96    | 0.3    | 15.5     | 66.5       | 3.1429  | 6.2857  |
| 2014 | June 24                 | 17.5    | 18.58667 | 0.0    | 0.7      | 21.5       | 4.8571  | 9.8571  |
| 2014 | July 08                 | 21.125  | 19.72    | 19.2   | 51.3     | 52.3       | 4.4286  | 8.7143  |
| 2014 | July 22                 | 23.6375 | 329.3    | 5.6    | 14.6     | 58.3       | 5.1429  | 11.2857 |
| 2014 | August 05               | 22.2    | 21.76    | 41.6   | 51.5     | 74.7       | 5.2857  | 9.7143  |
| 2014 | August 19               | 17.5625 | 19.8     | 11.3   | 15.0     | 69.1       | 6.1429  | 10.0000 |
| 2014 | September 03            | 16.0375 | 15.96875 | 14.6   | 26.7     | 83.2       | 4.8571  | 7.5714  |
| 2014 | September 16            | 16.95   | 18.02857 | 118.3  | 118.4    | 156.3      | 4.7143  | 8.4286  |
| 2014 | October 01              | 13.5625 | 14.65625 | 14.9   | 21.3     | 154.3      | 4.2857  | 8.0000  |
| 2015 | June 18                 | 20.1625 | 20.36667 | 1.1    | 1.1      | 47.3       | 5.4286  | 10.4286 |
| 2015 | July 01                 | 18.3625 | 16.62    | 0      | 15.7     | 37.5       | 5.2857  | 9.8571  |
| 2015 | July 16                 | 19.9875 | 2.3      | 0.4    | 9.2      | 24.9       | 5.1429  | 11.2857 |
| 2015 | July 30                 | 21.475  | 24.03333 | 12.7   | 12.7     | 21.9       | 5.8571  | 10.4286 |
|      |                         | 27.5125 | 24.74286 | 0.2    | 3.7      | 16.8       | 3.5714  | 9.5714  |

|      |              |         |          |     |       |       |        |         |
|------|--------------|---------|----------|-----|-------|-------|--------|---------|
| 2015 | August 12    |         |          |     |       |       |        |         |
| 2015 | August 27    | 19.0625 | 20.89333 | 4.4 | 131.0 | 147.4 | 5.0000 | 9.8571  |
| 2015 | September 10 | 15.5125 | 19.38667 | 2.1 | 2.5   | 133.7 | 6.1429 | 10.1429 |
| 2015 | September 24 | 17.175  | 17.84667 | 0.2 | 10.9  | 37.8  | 6.8571 | 11.5714 |

---
